# Supplementary material
Source: publisher figshare collection journal article supplement (https://acs.figshare.com/ndownloader/files/9353311)
Supplement: Supplementary file 1 [file 9353311]

# Support Material

## Water adsorption isotherms on fly ash from several sources

Juan G. Navea <sup>a,\*</sup>, Emily Richmond,<sup>a</sup> Talia Stortini,<sup>a</sup> and Jillian Greenspan,<sup>a</sup>

<sup>a</sup>*Chemistry Department, Skidmore College, Saratoga Springs, NY, 12866-1632*

\* To whom correspondence should be addressed. Email: [jnavea@skidmore.edu](mailto:jnavea@skidmore.edu) (J. Navea)

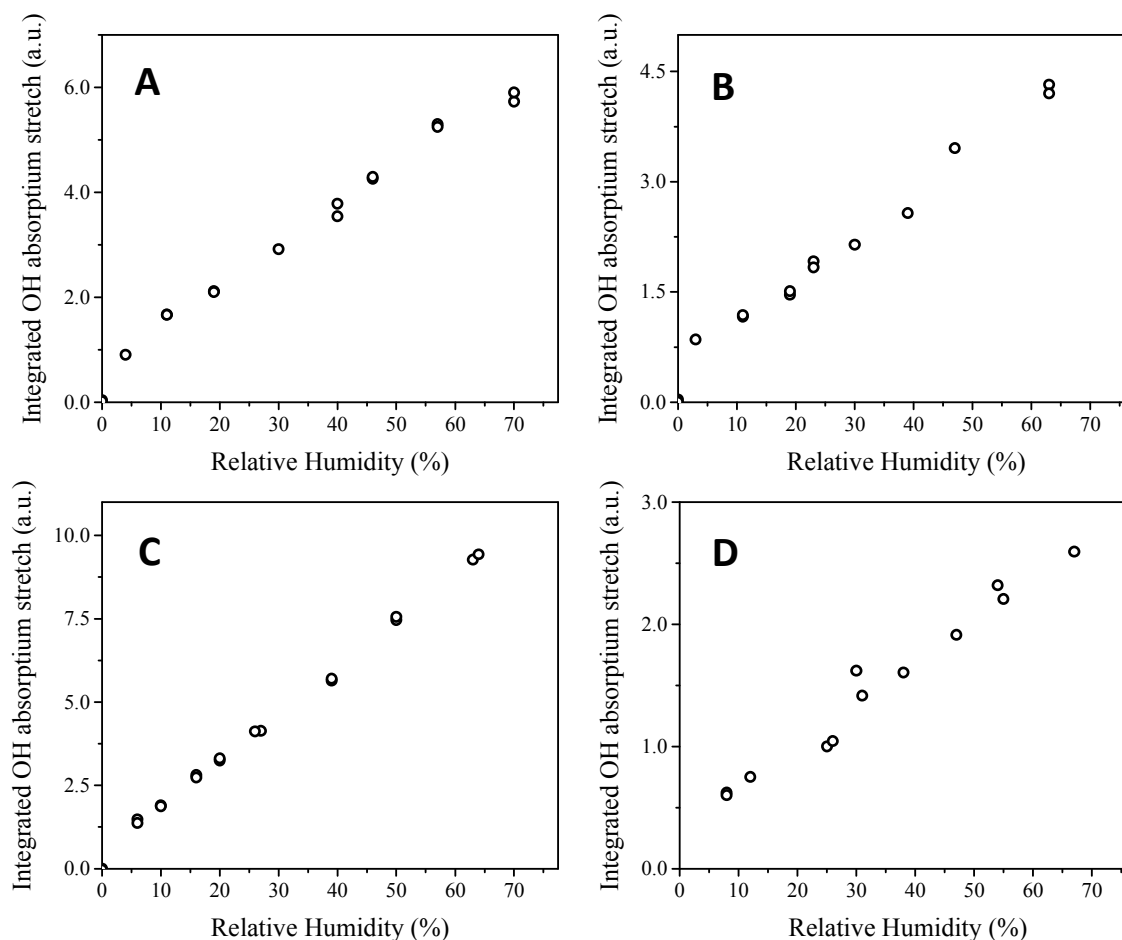

**Figure S1:** Qualitative trend of water adsorption on fly ash from infrared data. Integrated absorbance of the OH stretch as a function of RH. (A) United States (USFA); (B) Northeast India (INFA); (C) Netherlands (NLFA); (D) Germany (DEFA).

Upon incrementally increasing the RH, the integrated absorbance of the OH stretching band in Figure 5 shows a growing trend with adsorbed water. The multicomponent complexity of the samples and water intermolecular interactions result in a less accurate depiction of water adsorption on fly ash, rendering impossible the assumptions required for water quantification using vibrational absorption bands.

German fly ash (DEFA) trace elemental composition is summarized in Table S1. For information on other fly ash samples, see reference 4 (Borgatta J. et. al. *Environ. Chem.* 2016;13(4)).

**Table S1:** elemental percentage of the major crustal elements in German fly ash (DEFA). The elemental analysis omits major components Al and Si. Error represents the standard deviation over triplicate measurements

| Trace Element | Mass fraction (ppm) |
|---------------|---------------------|
| Fe            | 33800±700           |
| Na            | 3740±150            |
| Zn            | 580±30              |
| Cu            | 176±9               |
| Cr            | 192±10              |
| Mn            | 479±16              |
| Pb            | 262±11              |
| Co            | 54±2                |
